# Supplementary material for: Loss of centromere function drives karyotype evolution in closely related Malassezia species
Source: bioRxiv or medRxiv preprint supplement (doi:10.1101/533794), 2019-11-26
Supplement: Supplementary file [file media-1.pdf]

## **Supplementary information for**

### **Centromere-mediated chromosome break drives karyotype evolution in closely related *Malassezia* species**

Sundar Ram Sankaranarayanan<sup>1</sup>, Giuseppe Ianiri<sup>2</sup>, Md. Hashim Reza<sup>1</sup>, Bhagya C. Thimmappa<sup>1,#</sup>, Promit Ganguly<sup>1</sup>, Marco A. Coelho<sup>2</sup>, Sheng Sun<sup>2</sup>, Rahul Siddharthan<sup>3</sup>, Christian Tellgren-Roth<sup>4</sup>, Thomas L Dawson Jr.<sup>5,6</sup>, Joseph Heitman<sup>2,\*</sup> and Kaustuv Sanyal<sup>1,\*</sup>

#### **Corresponding authors**

Joseph Heitman ([heitm001@duke.edu](mailto:heitm001@duke.edu))

Kaustuv Sanyal ([sanyal@jncasr.ac.in](mailto:sanyal@jncasr.ac.in))

#### **This file includes**

Supplementary materials and methods

Figures S1-S4

Tables S1-S8

Supplementary references

## Supplementary Materials and Methods

### Construction of the *M. sympodialis* strain expressing GFP-Mtw1

The allele for N-terminal tagging of Mtw1 with GFP was prepared by gap repair (1) in the *Saccharomyces cerevisiae* BY4741 strain. Briefly, a 1.6 kb fragment consisting of upstream and promoter sequence of the *MTW1* gene and a 1.6 kb fragment having *MTW1* ORF along with downstream sequence was amplified from *M. sympodialis* genomic DNA. The GFP ORF (without the stop codon) and NAT were amplified from pVY7 and pAIM1 respectively (2, 3). *S. cerevisiae* was transformed with all four fragments and the linearized plasmid pGI3 (digested with KpnI and BamHI) and the epitope tagged allele was assembled in an ordered way by gap repair. Total DNA was isolated from *S. cerevisiae* and *E. coli* DH5 $\alpha$  strain was transformed. The pGFP-Mtw1 construct was screened by restriction digestion and further confirmed by sequencing. The pGFP-Mtw1 construct was used to transform *M. sympodialis* strain ATCC42132 by *Agrobacterium tumefaciens*-mediated transconjugation (2, 4).

### Microscopic imaging of live cells and processing

The GFP-Mtw1 strain was inoculated to 1% v/v from a saturated starter culture grown in mDixon media. Upon growth for 6 h, these cells were pelleted at 4,000 rpm and washed thrice with 1x phosphate buffered saline (PBS) and the cell suspension was placed on a clean glass slide. A coverslip was placed on the spot and sealed prior imaging. The images were acquired at room temperature using laser scanning inverted confocal microscope LSM 880-Airyscan (ZEISS, Plan Apochromat 63x, NA oil 1.4) equipped with highly sensitive photo-detectors. The filters used were GFP/FITC 488 excitation and GFP/FITC 500/550 band pass, long pass for emission. Z- stack images were taken at every 0.3  $\mu\text{m}$  and processed using ZEISS Zen software/ ImageJ. All the images were processed post acquisition with minimal adjustments to levels and linear contrast until the signals were highlighted.

### Preparation of *M. sympodialis* spheroplasts

Cells grown on mDixon's media were washed with water by centrifugation at 4000 rpm for 5 minutes. Cells were resuspended in 10 mL of 5% (v/v) 2-mercaptoethanol solution in water, incubated at 30°C/ 150 rpm for 45 min. The cells were pelleted, washed, and resuspended in 3 mL spheroplasting buffer (40 mM Citric acid, 120 mM Na<sub>2</sub>HPO<sub>4</sub> and 1.2 M Sorbitol) for every 1.5x10<sup>9</sup> cells. Cell clumps were dissociated by mild sonication for 30 s using the medium intensity setting in a Bioruptor (Diagenode). Lysing enzymes from *Trichoderma haziarnum* and Zymolyase-20T were added at 20 mg/mL and 100  $\mu\text{g/mL}$  respectively. The spheroplasting suspension was incubated at

30°C/ 65 rpm for 6 to 8 h. Digestion was checked by microscopic observation. Spheroplasts were washed with ice cold PBS and used as per the experimental design. (Adapted from (5)).

### **Indirect Immunofluorescence**

The GFP-Mtw1 strain was inoculated to 1% (v/v) from a saturated starter culture grown in mDixon media. After growth for 6 h, the cells were fixed by addition of formaldehyde to a final concentration of 3.7% for 1 h. Post fixing, the cells were washed with water and taken for preparation of spheroplasts (described above). Spheroplasts were washed with ice cold 1x-PBS and resuspended in ice cold 1x-PBS to a cell density suitable for microscopy. Slides for microscopy were washed with water and coated with poly L-Lysine (15 µL of 10 mg/mL solution per well) for 5 min at room temperature. The solution was aspirated and washed once with water. Cell suspension was added to each well (15-20 µL) and allowed to stand at room temperature for 5 min. Cell suspension was aspirated and the slides were washed with water once to remove unbound cells. The slides were fixed in ice-cold methanol for 6 min followed by treatment with ice-cold acetone for 30 s. Post fixing, blocking solution (2% non-fat skim milk in 1x-PBS) was added to each well, incubated at room temperature for 30 min. After this, the blocking solution was aspirated and primary antibodies were added (mouse anti-GFP antibodies [Sigma] at 1:100 dilution). After incubation for 1 h at room temperature, the slide was washed 8 times with 1x-PBS giving 2 min incubation for every wash. Secondary antibody solution (goat anti-mouse-AlexaFluor488 [Invitrogen] at 1:500 dilution) was added to each well and incubated for 1 h in dark at room temperature. Post incubation, slides were washed as described above. Mounting medium (DAPI at 100 ng/mL in 70 % glycerol) was added, incubated for 5 min and aspirated out. Slides were sealed with a clean coverslip and proceeded for imaging. The images were acquired at room temperature using inverted fluorescence microscope (ZEISSAxio Observer, Plan Apochromat 100x, NA oil 1.4). Z- stack images were taken at every 0.3 µm and processed using ZEISS Zen software/ ImageJ.

### **Chromatin immunoprecipitation and sequencing**

The protocol used for ChIP was adapted from the protocol used for *C. neoformans* (6). Logarithmically grown cells were fixed using formaldehyde at a final concentration of 1% for 30 min (for Mtw1 ChIP) and 15 min (for histone H3 ChIP) respectively. The reaction was quenched by the addition of glycine to a final concentration of 0.135 M. Cells were pelleted and processed for spheroplasting as described above. Spheroplasts were washed once sequentially using 10 mL of the following ice-cold buffers: 1x PBS, Buffer-I (0.25% Triton X-100, 10 mM EDTA, 0.5 mM EGTA, 10 mM Na-HEPES pH=6.5), Buffer-II (200 mM NaCl, 1mM EDTA, 0.5 mM EGTA, 10 mM Na-

HEPES pH=6.5). The pellet after final wash was resuspended in 1 mL lysis buffer (50 mM HEPES pH=7.4, 1% Triton X-100, 140 mM NaCl, 0.1% Na-deoxycholate, 1 mM EDTA) for every  $1.5 \times 10^9$  cells. Protease inhibitor cocktail was added to 1x final concentration. The resuspended spheroplasts were subjected to sonication using a Bioruptor (Diagenode) using 30 s ON/OFF pulse at high intensity mode with intermittent incubation in ice to obtain chromatin fragments of range 100-300 bp. Lysate was cleared after sonication by centrifugation at 13,000 rpm for 10 min at 4°C. Input DNA fraction was separated at this step (1/10<sup>th</sup> volume of lysate) and processed for de-crosslinking by addition of 400  $\mu$ L elution buffer (0.1 M NaHCO<sub>3</sub>, 1% SDS) per 100  $\mu$ L lysate (processing for de-crosslinking mentioned below). The remaining lysate was split equally and processed as IP and control samples. 20  $\mu$ L GFP trap and blocked agarose beads respectively were used for IP and control. In the case of histone H3 ChIP, 10  $\mu$ L anti H3 antibodies were used per IP along with 20  $\mu$ L Protein-A sepharose beads. Samples were rotated for 6 h at 4°C. Post incubation, samples were sequentially washed as follows: Twice with 1 mL low salt wash buffer (0.1% SDS, 1% Triton X-100, 2 mM EDTA, 20 mM Tris pH=8.0, 150 mM NaCl), twice with 1 mL high salt wash buffer (0.1% SDS, 1% Triton X-100, 2 mM EDTA, 20 mM Tris pH=8.0, 500 mM NaCl), once with 1 mL LiCl wash buffer (0.25 M LiCl, 1% NP-40, 1% Na-deoxycholate, 1 mM EDTA, 10 mM Tris pH=8.0) and twice with 1 mL 1xTE (10 mM Tris pH=8.0, 1 mM EDTA). Samples were rotated in a rotaspin for 5 min at room temperature for every wash (15 min in case of Histone H3 ChIP). After washes, DNA was eluted from the beads twice using 250  $\mu$ L elution buffer. The samples for elution were incubated at 65°C for 5 min, rotated for 15 min and then collected by centrifugation. Samples were decrosslinked by addition of 20  $\mu$ L 5 M NaCl and incubation at 65°C for 6 h. Following this, samples were deproteinized by addition of 10  $\mu$ L 0.5 M EDTA, 20  $\mu$ L 1 M Tris pH6.8, 2  $\mu$ L Proteinase K (20 mg/L) and incubation at 45°C for 2 h. After incubation, samples were treated with equal volume of phenol-chloroform-isoamyl alcohol (25:24:1) mix, and the aqueous phase was extracted by centrifugation. DNA was precipitated by addition of 1/10<sup>th</sup> volume of 3 M Na-acetate, 1  $\mu$ L glycogen (20 mg/mL), 1 mL absolute ethanol and incubation at -20°C for at least 12 h. Finally, the samples were harvested by centrifugation at 13,000 rpm for 45 min followed by washing the pellet once with 70% ethanol. Air dried pellets were then resuspended in 30  $\mu$ L sterile MilliQ water with 10  $\mu$ g/mL RNase. Samples were analysed by qPCR using the primers mentioned in the key resources table.

### **Analysis of sequencing data**

GFP-Mtw1 ChIP sequencing was performed at the Clevergene Biocorp. Pvt. Ltd., Bengaluru, India. A total of 46,704,720 and 63,524,912 150 bp paired-end reads were obtained for IP and Input samples, respectively. The reads were mapped to *M. sympodialis* ATCC42132 genome using

Geneious 9.0 (<http://www.geneious.com/>) with default conditions. Each read was allowed to map only once randomly anywhere in the genome. The alignments were exported to bam files, sorted and visualized using Integrative Genomics Viewer (IGV, Broad Institute). The images from IGV were imported into Adobe Photoshop (Adobe systems) and scaled for representation purpose. RNA-sequencing data (E-MTAB-4589) from a previous study was downloaded ArrayExpress website, sorted and visualized using IGV. GC-content was calculated using Geneious 9.0 with a sliding window size of 250 bp. The data was exported as wig files and further visualized using IGV.

### **Western Blotting**

Protein lysates for western blot were prepared by the TCA method. One mL overnight grown cultures were harvested, washed and resuspended in 400  $\mu$ L of 12.5% ice cold TCA solution. The suspension was vortexed briefly and stored at  $-20^{\circ}\text{C}$  for 4 to 6 h. The suspension was thawed on ice, pelleted at 14,000 rpm for 10 min and washed twice with 350  $\mu$ L of 80% Acetone (ice cold). The washed pellets were air dried completely and resuspended in desired volume of lysis buffer (0.1 N NaOH+1% SDS). Samples were separated in 12% polyacrylamide gels, transferred onto Nitrocellulose membrane. For probing, mouse anti-GFP antibody (Roche) and the HRP conjugated goat anti-mouse secondary antibody (Bangalore Genei), were used at 1:3000 and 1:5000 dilution respectively in 2.5% skim milk powder in 1x-PBS. The blots were developed using Chemiluminescence Ultra substrate (BioRad) and imaged using VersaDoc imaging system.

### **PFGE analysis for *M. globosa* and *M. slooffiae***

For CHEF analysis of *M. globosa* (CBS7966) and *M. slooffiae* (CBS7956), the cells grown on solid mDixon medium were collected and resuspended in PBS. CHEF plugs were prepared as described in previous studies (7, 8). Chromosomes were separated in 1% Megabase certified agarose gel made with  $0.5 \times$  TBE, using a BioRad CHEF-DR II System running at 3.2 V/cm with linear ramping switching time from 90 to 360 seconds for 120 hours in  $0.5 \times$  TBE at  $14^{\circ}\text{C}$ . The gel was stained with EtBr and visualized under UV.

For the chromoblot analyses of *M. globosa* (CBS7966), the gel from the CHEF analysis was first transferred to membrane, and the resulting chromoblots were then hybridized with four probes from the chromosomes 3, 4, 5, and 6 of the CBS7966 genome assembly, respectively (see the Table for the primer information), as described in previous studies (6, 9).

### ***M. globosa* genome assembly**

Sequence reads were assembled using HGAP3 included in SMRTPortal v2.3 (PacBio, Menlo Park, CA, USA) with default parameters except for the genome size set to 9 Mb. Assembly completeness was evaluated by checking for telomeric repeats. Non-telomeric contig-ends were aligned to other contigs using BLAST and unique overlaps used to build complete chromosomes. Short telomere ends were extended using uniquely mapping reads longer than 10 kb and repolishing of the assembly using the resequencing pipeline in SMRTPortal v2.3. The assembly resulted in 19 contigs, with a total length of 9.2 Mb. 17 long and 1 short telomere could be identified. 6 contigs had telomeres on the 5'- and 3'-end thus representing full-length chromosomes (Chr1, 2, 3, 6, 7 and 8). 6 contigs had only one telomere and 7 contigs had no telomeric sequence. 2 contigs without telomeres were from the mitochondrion and 2 were from the ribosomal repeats. Chromosome 5 was constructed from 2 contigs ending in ribosomal repeats. The assembly contains 6 copies of the repeat, but read coverage suggested a length of 30-40 repeat units that cannot be resolved with the available read length. The remaining contigs were used to build chromosomes 4 and 9 that share highly similar 5'-ends. The two ends can be distinguished by two microsatellite expansions. Chromosome 4 had a very short 3'-telomere from the default assembly, but the raw data contained a uniquely mapping read that extended several repeat units past the assembly end. After polishing the reference, all 9 chromosomes had clear 5'- and 3'- telomeres.

### ***M. slooffiae* genome assembly**

Sequence reads were assembled using HGAP3 included in SMRTPortal v2.3 (PacBio, Menlo Park, CA, USA) with default parameters. This resulted in an assembly with 14 scaffolds with telomeric repeats at both ends in 9 contigs. Of the remaining five contigs, three of them could be assigned to mitochondrial DNA based on BLAST analysis with *M. globosa*. The remaining two contigs of sized 5.8 kb and 2.3 kb respectively did not show BLAST hits against *M. globosa* or *M. sympodialis* genomes. Synteny analysis in this study was done using this assembly.

### **Synteny analysis**

For synteny conservation across the centromeres as indicated in Figure S2B, the analysis was performed by BLAST as follows. The genomes for *M. restricta*, *M. nana* and *M. dermatis* were downloaded from the NCBI genomes portal. The PacBio assembled genomes of *M. globosa* and *M. slooffiae* were used for synteny analysis. Synteny analysis were done in context of ORFs flanking the centromeres of *M. sympodialis*. The protein sequences for each of these ORFs were used as query in BLAST analysis against the genome of other species. Local database for each genome was setup using Geneious software for this analysis. The percentage identity values for each ORFs are mentioned in the boxes in Figure S2B. Additionally, synteny analyses between *M. globosa* and *M. sympodialis* were conducted using megablast

(word size: 28) and plotted together with GC content (calculated as deviation from the genomic mean, in non-overlapping 1 kb windows), using Circos (v0.69-6) (10). Additional whole-genome alignments were conducted with Satsuma (11), with default parameters. The linear synteny comparisons shown in Figure 3C were generated with Python application EasyFig (12).

## Supplementary figure legends

### Figure S1. Properties of centromeres in *M. sympodialis* and *M. globosa*

(A) A 30 kb window of Mtw1 enrichment profile (*CEN*, red) plotted with the GC content (%GC, blue) and regions of transcription (RNA-seq, green). Ruler in each box indicates chromosomal coordinates in kb. The scales in y-axis are as follows: *CEN* (0-8000), %GC (0-80), RNA-seq reads (0-1500). Green arrows in each panel indicate predicted ORFs based on RNA-seq data. (B) Heat-map indicating the region having the maximum enrichment observed from the ChIP-seq data in *M. sympodialis*. *CEN*, Mtw1 enriched regions; %GC, GC content of the region; ORF, genes present in the Mtw1 enriched regions predicted from RNA-seq data of *M. sympodialis*. Pink colored box represent heat-maps showing maximum enrichment (dark red) at the intergenic regions. (C) Normalized read counts (RPKM) for transcripts from ORFs flanking the centromere as compared with the genome average RPKM value calculated from RNA-seq data of *M. sympodialis* (ATCC42132). The x-axis represents ORFs labeled L1 - L5 and R1 - R5, with L1 and R1 being proximal to the GC trough of the centromere. Genome average considered for comparison is labeled as global. The y-axis represents Log<sub>2</sub>RPKM values. (D) Fold change in Mtw1 and histone H3 enrichment at *CEN7* as compared to control region by qPCR analysis. Schematic representation of a 5 kb region of Chr7 with *CEN7* (Red box) is depicted below the graph. Black lines indicate regions assayed by PCR: Core- region corresponding to the GC trough, L1 and R1- 750 bp away from the core, L2- 1500 bp away from the core, and Control- ORF region (190 kb away from *CEN1*). The x-axis indicates regions across the *CEN* probed by PCR and y-axis indicates fold reduction in histone H3 enrichment. Error bars indicate standard error of the mean (SEM). (E) Dot-plot generated by plotting sequences from the Mtw1 enriched regions in *M. sympodialis* against themselves is depicted. (F) Dot-plot generated by plotting sequences of the intergenic regions harboring the GC troughs (predicted centromeres) in *M. globosa* against themselves. Diagonal lines in C and D indicate self-identity.

### Figure S2. Comparative analysis of *M. globosa* and *M. sympodialis* genomes.

(A) Electrophoretic karyotype of *M. globosa* and *S. cerevisiae*. Chromosome sizes marked for *M. globosa* are estimated from the genome assembly. The Asterisks indicate doublet bands. Chr5 that contains rDNA locus (902 kb) is a part of the doublet marked with an asterisk. (B) Electrophoretic karyotype of *M. slooffiae* and *S. cerevisiae*. Chromosome sizes marked for *M. globosa* are estimated from the genome

assembly. Asterisks indicate doublet bands. (C) Zoomed-in image of the synteny breakpoint shown for MgChr2 representing the conservation of synteny at the ORF level. Pink arrows represent ORFs from MgChr2 and their homologs on MsChr2 and MsChr4, with orange ribbons representing their synteny. Purple arrows represent ORFs from MgChr4 and their homologs in MsChr4 with blue ribbon connectors depicting synteny. Labels in black circles mark the synteny breakpoints. Synteny breakpoint of MgChr2 is marked as *MgCEN2(III)*. The regions on MsChr2 and MsChr4 where the homologs of ORFs flanking the breakpoint are located are marked II and IV. The synteny block start site between MgChr4 and MsChr4 of *M. globosa* is labeled V.

**Figure S3. The 12 bp AT-rich motif is enriched across centromeres of *Malassezia* species used in this study.** (A-F) The genomes of *M. sympodialis*, *M. globosa*, *M. restricta*, *M. slooffiae*, *M. dermatis* and *M. nana* were scanned for matches to the 12bp AT-rich motif using a 500 bp sliding window. Hit counts (y axis) were plotted against the chromosomal coordinates (x axis, in kb) for each of the above species. Red asterisks near the line corresponding to maximum enrichment in every chromosome or scaffold mark the regions predicted as centromeres in each species.

**Figure S4. Eight of the nine predicted centromeres of *M. globosa* and *M. slooffiae* are flanked by ORFs with synteny to *M. sympodialis* centromeres.** Gene order and synteny of ORFs flanking the centromeres of 6 *Malassezia* species analyzed in this study using the protein sequences (MSYGxxxx) from *M. sympodialis* as query. Species included are as follows: Mna- *M. nana*, Mde- *M. dermatis*, Msy- *M. sympodialis*, Mgl- *M. globosa*, Msl- *M. slooffiae*, and Mre- *M. restricta*. Chromosome/scaffold numbers are indicated at the start of every track. BCL2.1 and BCK2.1 are abbreviations for scaffolds BCLA0104.1 and BCKX0104.1 respectively. Boxes represent ORFs with the numbers inside them indicating percentage identity from BLAST analysis. Broken lines marked with filled circle towards the ends indicate synteny break. Blue arrows indicate inverted orientation of the scaffold/chromosome.



## Supplementary tables

### Supplementary table S1. Identification of kinetochore proteins in *M. sympodialis* by BLAST

Sequences of *C. neoformans* homologs were used as query. Asterisk (\*) indicates cases where sequences from *Ustilago maydis* homologs were used as query. ND- not detected. To detect proteins of Cbf3 complex, sequences of *S. cerevisiae* homologs were used as query.

|                            | Sub Complex       | Query                                             | Protein ID (SHOxxxxx.x) | % Identity | E- value | Query coverage |  |
|----------------------------|-------------------|---------------------------------------------------|-------------------------|------------|----------|----------------|--|
| Outer kinetochore          | Dam1 complex      | Ask1                                              | 79565.1                 | 27.4       | 4.84e-22 | 65.64          |  |
|                            |                   | Dad1                                              | 75772.1                 | 47.1       | 4.44e-01 | 27.36          |  |
|                            |                   | Dad2*                                             | 79986.1                 | 40         | 9.9e-23  | 82.89          |  |
|                            |                   | Dad3                                              | 77770.1                 | 42.5       | 3.62e-10 | 78.75          |  |
|                            |                   | Dad4                                              | 79701.1                 | 39.1       | 1.24e-09 | 95.83          |  |
|                            |                   | Dam1                                              | 79667.1                 | 43.7       | 6.44e-08 | 45.45          |  |
|                            |                   | Duo1                                              | 76611.1                 | 27.4       | 1.19e-04 | 17.63          |  |
|                            |                   | Spc19                                             | ND                      |            |          |                |  |
|                            |                   | Spc34                                             | ND                      |            |          |                |  |
|                            | Hsk3*             | 77065.1                                           | 41.9                    | 1.6e-15    | 92.68    |                |  |
|                            | Ndc80 complex     | Ndc80                                             | 79901.1                 | 25.6       | 1.15e-36 | 80.33          |  |
|                            |                   | Nuf2                                              | 78898.1                 | 25.8       | 7.64e-14 | 74.59          |  |
|                            |                   | Spc24                                             | ND                      |            |          |                |  |
|                            |                   | Spc25                                             | 78263.1                 | 25.8       | 1.1e-07  | 42.18          |  |
|                            | Mtw1 complex      | Mis12                                             | 76526.1                 | 25.1       | 5.67e-09 | 70.91          |  |
|                            |                   | Dsn1                                              | 78762.1                 | 24.4       | 3.94e-08 | 24.05          |  |
|                            |                   | Nnf1*                                             | 77715.1                 | 40.8       | 2.10E-19 | 35.9           |  |
|                            |                   | Nsl1*                                             | 79581.1                 | 28.3       | 1.68E-06 | 42             |  |
|                            | KNL1              | Spc105                                            | 75936.1                 | 19.9       | 5.36e-11 | 40.59          |  |
|                            | Inner kinetochore | Constitutive Centromere Associated Network (CCAN) | Cnn1/Wip1/Mhf1/Mhf2     | ND         |          |                |  |
| Mcm16/Mcm22/Ctf3           |                   |                                                   | ND                      |            |          |                |  |
| Okp1/Ame1/Ctf19/Mcm21      |                   |                                                   | ND                      |            |          |                |  |
| Chl4/Iml3                  |                   |                                                   | ND                      |            |          |                |  |
| CENP-C                     |                   | Mif2                                              | 79930.1                 | 35.8       | 5.77e-29 | 22.67          |  |
| CENP-A                     |                   | Cse4                                              | 76408.1                 | 70.8       | 2.77e-46 | 66.67          |  |
| Point CEN specific complex | Cbf3 complex      | Ndc10                                             | ND                      |            |          |                |  |
|                            |                   | Cep16                                             | ND                      |            |          |                |  |
|                            |                   | Ctf3                                              | ND                      |            |          |                |  |

**Supplementary table S2. Coordinates of centromeres and their GC content in *M. sympodialis***

Coordinates, length and GC content of Mtw1 enriched regions in comparison with that of the predicted centromeres in *M. sympodialis*.

| Chr.  | CEN start (bp) | CEN end (bp) | CEN length (bp) | GC content |      | Predicted CEN (AT-rich core) |            |          |
|-------|----------------|--------------|-----------------|------------|------|------------------------------|------------|----------|
|       |                |              |                 | CEN        | Chr. | Coordinates                  | Start (bp) | End (bp) |
| Chr 1 | 784833         | 788599       | 3767            | 41         | 58   | Chr 1                        | 786541     | 787061   |
| Chr 2 | 354218         | 357486       | 3269            | 41         | 58.6 | Chr 2                        | 355760     | 355841   |
| Chr 3 | 235615         | 239940       | 4326            | 44         | 59.5 | Chr 3                        | 237534     | 238686   |
| Chr 4 | 415985         | 420656       | 4672            | 58         | 60.7 | Chr 4                        | 418202     | 418728   |
| Chr 5 | 100342         | 105251       | 4910            | 48         | 60   | Chr 5                        | 101950     | 102502   |
| Chr 6 | 430028         | 433194       | 3167            | 48         | 60.3 | Chr 6                        | 431542     | 431987   |
| Chr 7 | 22334          | 27476        | 5143            | 51         | 60.9 | Chr 7                        | 24694      | 25564    |
| Chr R | 123219         | 127284       | 4066            | 47         | 57.6 | Chr R                        | 125056     | 125220   |

**Table S3. Coordinates of centromeres in closely related *Malassezia* species**

Coordinates and length of centromeres predicted based on GC troughs and conservation of gene synteny with centromeres of *M. sympodialis*. ‘\*’ indicates scaffolds containing rDNA locus, ‘#’ indicates partial synteny conservation which includes CEN and ORFs on one side of the centromeres.

|                     | Chr./Scaffold    | CEN         | Start   | End     | Length (bp) | Syntenous <i>MsCEN</i> |
|---------------------|------------------|-------------|---------|---------|-------------|------------------------|
| <i>M. globosa</i>   | Chr1             | <i>CEN1</i> | 981894  | 982242  | 349         | <i>CEN3</i>            |
|                     | Chr2             | <i>CEN2</i> | 362480  | 362807  | 327         | -                      |
|                     | Chr3             | <i>CEN3</i> | 219647  | 220121  | 474         | <i>CEN1</i>            |
|                     | Chr4             | <i>CEN4</i> | 152635  | 152994  | 359         | <i>CEN4</i>            |
|                     | Chr5             | <i>CEN5</i> | 464007  | 464114  | 107         | <i>CEN2</i>            |
|                     | Chr6             | <i>CEN6</i> | 736701  | 737015  | 314         | <i>CEN5</i>            |
|                     | Chr7             | <i>CEN7</i> | 59472   | 59817   | 345         | <i>CEN7</i>            |
|                     | Chr8             | <i>CEN8</i> | 110988  | 114481  | 3493        | <i>CEN6</i>            |
|                     | ChrR*            | <i>CENR</i> | 215437  | 215595  | 158         | <i>CENR</i>            |
| <i>M. slooffiae</i> | unitig_1 quiver  | <i>CEN2</i> | 132,717 | 133,193 | 477         | <i>CEN1</i>            |
|                     | unitig_2 quiver  | <i>CEN3</i> | 367,665 | 368,177 | 513         | <i>CEN3</i>            |
|                     | unitig_3 quiver  | <i>CEN4</i> | 130,942 | 131,501 | 560         | <i>CEN4</i>            |
|                     | unitig_4 quiver  | <i>CEN5</i> | 183,442 | 183,981 | 540         | -                      |
|                     | unitig_5 quiver  | <i>CEN6</i> | 411,984 | 412,552 | 569         | <i>CEN2</i>            |
|                     | unitig_6 quiver  | <i>CEN7</i> | 54,307  | 54,889  | 583         | <i>CEN5</i>            |
|                     | unitig_7 quiver  | <i>CEN8</i> | 497,637 | 498,149 | 513         | <i>CEN6</i>            |
|                     | unitig_8 quiver  | <i>CEN9</i> | 55,948  | 56,479  | 532         | <i>CEN7</i>            |
|                     | unitig_0 quiver* | <i>CENR</i> | 138,919 | 139,465 | 547         | <i>CENR</i>            |

|                     |                 |             |           |           |     |                          |
|---------------------|-----------------|-------------|-----------|-----------|-----|--------------------------|
| <i>M. restricta</i> | Scaffold 1      | <i>CEN1</i> | 347,813   | 348,406   | 594 | <i>CEN4</i> <sup>#</sup> |
|                     | Scaffold 2      | <i>CEN2</i> | 87,190    | 87,806    | 617 | <i>CENR</i>              |
|                     | Scaffold 3      | <i>CEN3</i> | 1,101,494 | 1,102,083 | 590 | <i>CEN3</i>              |
|                     | Scaffold 4      | <i>CEN4</i> | 754,356   | 754,989   | 634 | <i>CEN1</i>              |
|                     | Scaffold 6      | <i>CEN6</i> | 621,177   | 621,863   | 687 | <i>CEN5</i>              |
|                     | Scaffold 7      | <i>CEN7</i> | 390,657   | 391,286   | 630 | <i>CEN2</i>              |
|                     | Scaffold 8      | <i>CEN8</i> | 362,842   | 363,381   | 540 | -                        |
|                     | Scaffold 9      | <i>CEN9</i> | 117,021   | 117,603   | 583 | <i>CEN7</i>              |
|                     | Scaffold 5*     | <i>CENR</i> | 70,306    | 70,913    | 608 | <i>CEN6</i>              |
| <i>M. nana</i>      | BCLA01000001.1  | <i>CEN1</i> | 715,036   | 715,592   | 557 | <i>CEN1</i>              |
|                     | BCLA01000002.1  | <i>CEN2</i> | 349,428   | 350,120   | 693 | <i>CEN2</i>              |
|                     | BCLA01000003.1  | <i>CEN3</i> | 220,773   | 221,345   | 573 | <i>CEN3</i>              |
|                     | BCLA01000004.1  | <i>CEN4</i> | 410,594   | 411,387   | 794 | <i>CEN4</i>              |
|                     | BCLA01000005.1  | <i>CEN5</i> | 524,594   | 525,105   | 512 | <i>CEN5</i>              |
|                     | BCLA01000007.1  | <i>CEN7</i> | 408,363   | 409,067   | 705 | <i>CEN6</i>              |
|                     | BCLA01000008.1  | <i>CEN8</i> | 398,756   | 399,423   | 668 | <i>CEN7</i>              |
|                     | BCLA01000006.1* | <i>CENR</i> | 133,647   | 134,324   | 678 | <i>CENR</i>              |
| <i>M. dermatis</i>  | BCKX01000001.1  | <i>CEN1</i> | 711,456   | 711,978   | 523 | <i>CEN1</i>              |
|                     | BCKX01000002.1  | <i>CEN2</i> | 1,014,281 | 1,014,977 | 697 | <i>CEN2</i>              |
|                     | BCKX01000003.1  | <i>CEN3</i> | 232,065   | 232,795   | 731 | <i>CEN3</i>              |
|                     | BCKX01000004.1  | <i>CEN4</i> | 409,839   | 410,631   | 793 | <i>CEN4</i>              |
|                     | BCKX01000005.1  | <i>CEN5</i> | 94,520    | 95,018    | 499 | <i>CEN5</i>              |
|                     | BCKX01000006.1  | <i>CEN6</i> | 473,487   | 474,334   | 848 | <i>CENR</i>              |
|                     | BCKX01000007.1  | <i>CEN7</i> | 76,361    | 76,975    | 615 | <i>CEN6</i>              |
|                     | BCKX01000008.1  | <i>CEN8</i> | 17,893    | 18,540    | 648 | <i>CEN7</i>              |

**Supplementary table S4. List of key reagents used in this study**

| <b>Antibodies and reagents</b>                   | <b>Source</b>   | <b>Identifier</b> |
|--------------------------------------------------|-----------------|-------------------|
| mouse anti-GFP                                   | Roche           | 11814460001       |
| mouse anti-PSTAIRES                              | Abcam           | Cat. no.10345     |
| goat anti-mouse HRP                              | Bangalore Genei | Cat. no. HP06     |
| rabbit anti-H3                                   | Abcam           | Cat. no. ab1791   |
| Lysing enzymes from <i>Trichoderma harzianum</i> | Sigma           | Cat. no. L1412    |
| Zymolyase 20T                                    | MP biomedicals  | Cat. no. 320921   |
| GFP trap beads                                   | ChromoTek       | Cat. no. gta-20   |
| Blocked agarose beads                            | ChromoTek       | Cat. no. bab-20   |
| Protein-A sepharose beads                        | Sigma           | Cat. no. P3391    |
| 2-meraptoethanol                                 | HiMedia         | Cat. no. MB041    |

**Supplementary table S5. List of strains used in this study**

| <b>Yeast Strains</b> |                                                                                    |
|----------------------|------------------------------------------------------------------------------------|
| ATCC42132            | <i>Wild-type Malassezia sympodialis</i>                                            |
| MSY001               | GFP-Mtw1-NAT in <i>M. sympodialis</i> ATCC42132                                    |
| CBS7966              | Wild-type <i>Malassezia globosa</i>                                                |
| CBS7956              | Wild-type <i>Malassezia slooffiae</i>                                              |
| BY4741               | Wild-type <i>S. cerevisiae</i> strain ( <i>MATa his3Δ1 leu2Δ0 met15Δ0 ura3Δ0</i> ) |

**Supplementary table S6. List of plasmids used in this study**

| <b>Plasmids</b>                 |            |
|---------------------------------|------------|
| Plasmid: pMHR04 (pGI3-GFP-Mtw1) | This study |
| Plasmid: pGI3                   | (13)       |
| Plasmid: pVY7                   | (3)        |
| Plasmid: pAIM1                  | (2)        |

**Supplementary table S7. List of oligonucleotides used in this study**

| <b>Oligonucleotides</b> |                                                         |                                                   |
|-------------------------|---------------------------------------------------------|---------------------------------------------------|
| Msy Mtw1 N-P1           | GCGCGCCTAGGCCTCTGCAGGTCGACTCTGAC<br>TGACCACGACGAGCTG    | Primers to tag Mtw1<br>with GFP at N-<br>terminus |
| Msy Mtw1 N-P2           | CGCCCTTGCTCACCATCGAGGGGTGGAGGTAC<br>AATAG               |                                                   |
| Msy Mtw1 N-P3           | CTATTGTACCTCCACCCCTCGATGGTGAGCAA<br>GGGCG               |                                                   |
| Msy Mtw1 N-P4           | GCGTCCGAGGTGGACATGTACAGCTCGTCCAT<br>GCC                 |                                                   |
| Msy Mtw1 N-P5           | GGCATGGACGAGCTGTAcATGTCCACCTCGGA<br>CGC                 |                                                   |
| Msy Mtw1 N-P6           | GAGGATCTGCACCGTGGCACATTGCGGATG<br>ATG                   |                                                   |
| Msy Mtw1 N-P7           | CATCATCGCGCAATGTGCCACGGTGCAGATCC<br>TC                  |                                                   |
| Msy Mtw1 N-P8           | TGATTACGAATTCTTAATTAAGATATCGAGCG<br>TCCTCTCCTATGTCTGACC |                                                   |
| MS1 F1                  | AAGAATTGATAACATTGTTGCAC                                 | <i>CEN1</i> primers                               |

|                                              |                               |                                          |
|----------------------------------------------|-------------------------------|------------------------------------------|
| MS1 R1                                       | TAGAATAAAATGTCGCGAAGG         |                                          |
| MS2 F1                                       | CTGAAGAAAAGAAACAAATTCG        | <i>CEN2</i> primers                      |
| MS2 R1                                       | TCGGAAATCCCGCAAAG             |                                          |
| MS3 F1                                       | CATATTCAGCCTCCACTAAG          | <i>CEN3</i> primers                      |
| MS3 R1                                       | CCTCTATCGAGTGCTCTAC           |                                          |
| MS4 F1                                       | CGATATGGATTGGACTTATAAGTC      | <i>CEN4</i> primers                      |
| MS4 R1                                       | AAAAGCAATACGTAGACGG           |                                          |
| MSChrR F1                                    | AAATTACCGACCAGAATTG           | <i>CENR</i> primers                      |
| MSChrR R1                                    | ATCTGTGTCCGCTCTCATC           |                                          |
| MS5 F1                                       | TTTGACGCTTTATTTGTGTTTC        | <i>CEN5</i> primers                      |
| MS5 R1                                       | CACATATGCACGAATAATAAAACG      |                                          |
| MS6 F1                                       | GATACATATTCTTACACTAATACTATTCG | <i>CEN6</i> primers                      |
| MS6 R1                                       | GCATAGAGCTAATATCTGATATTC      |                                          |
| MS7 F1                                       | GGAAGCATGAGATATTGG            | <i>CEN7</i> primers                      |
| MS7 R1                                       | AAACAAAGTAAAATTCTAATCACG      |                                          |
| MS7 LF1                                      | CTCCTCCGATACGATTCAC           | <i>CEN7</i> L1 primers                   |
| MS7 LR1                                      | CAGCCATTATCTCCGACAC           |                                          |
| MS7 LF2                                      | CTGGGTAGATTGAGAATGAG          | <i>CEN7</i> L2 primers                   |
| MS7 LR2                                      | CATGTATGTTTCAGTCCCATG         |                                          |
| MS7 RF1                                      | ATGATCCAAAAGAAAGCATAAC        | <i>CEN7</i> R1 primers                   |
| MS7 RR1                                      | GAAGTATGTCTGGGTGAAGC          |                                          |
| MS C3                                        | GAAGACGACAACGATAACC           | Control primers<br>away from <i>CEN1</i> |
| MS C4                                        | TAGCGAGTGAATAGCGTC            |                                          |
| Maglo_CBS7966_v2_Chr3_216001_216700_Foward:  | GATGAGCGACGGAAACAAGC          | Probe for Chr3                           |
| Maglo_CBS7966_v2_Chr3_216001_216700_Reverse: | AACTTCGTCCCATTCGCCTT          |                                          |
| Maglo_CBS7966_v2_Chr4_150001_150700_Foward:  | CATCGAGATTGCAACACAGC          | Probe for Chr4                           |

|                                              |                       |                        |
|----------------------------------------------|-----------------------|------------------------|
| Maglo_CBS7966_v2_Chr4_150001_150700_Reverse: | TGAACACAGGCGCCATTGTA  |                        |
| Maglo_CBS7966_v2_Chr5_213001_213600_Forward: | TGCAATGAAGTCCGGCATGA  | Probe for present ChrR |
| Maglo_CBS7966_v2_Chr5_213001_213600_Reverse: | AGGCACACGTTTCATCTGGTT |                        |
| Maglo_CBS7966_v2_Chr6_461001_461600_Forward: | TGCTCACCCAAAAGACGACC  | Probe for present Chr5 |
| Maglo_CBS7966_v2_Chr6_461001_461600_Reverse: | CGCGGACCTGGAAGTGTATT  |                        |

**Supplementary table S8. List of software and algorithms used in this study**

| <b>Software and Algorithms</b>   |                              |                                                                                               |
|----------------------------------|------------------------------|-----------------------------------------------------------------------------------------------|
| Fiji                             | National Institute of Health | <a href="https://fiji.sc/">https://fiji.sc/</a>                                               |
| Photoshop CS6                    | Adobe Systems                | <a href="https://www.adobe.com">https://www.adobe.com</a>                                     |
| Excel                            | Microsoft                    | <a href="https://products.office.com/en-in/excel">https://products.office.com/en-in/excel</a> |
| Word                             | Microsoft                    | <a href="https://products.office.com/en-in/word">https://products.office.com/en-in/word</a>   |
| Geneious 9.0                     | Biomatters Ltd.              | <a href="http://www.geneious.com/">http://www.geneious.com/</a>                               |
| SyMap                            | (14)                         |                                                                                               |
| PhylloGibbs-MP                   | (15)                         |                                                                                               |
| Fast Statistical Alignment (FSA) | (16)                         |                                                                                               |
| Circos                           | (10)                         |                                                                                               |
| Satsuma                          | (11)                         |                                                                                               |
| Easyfig                          | (12)                         |                                                                                               |

# Supplementary figures

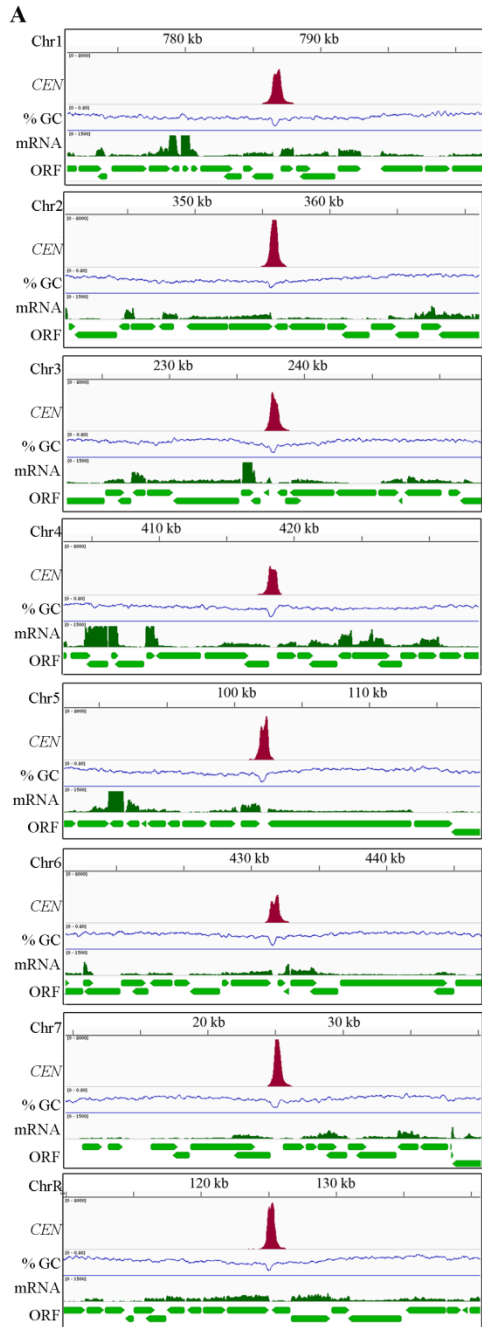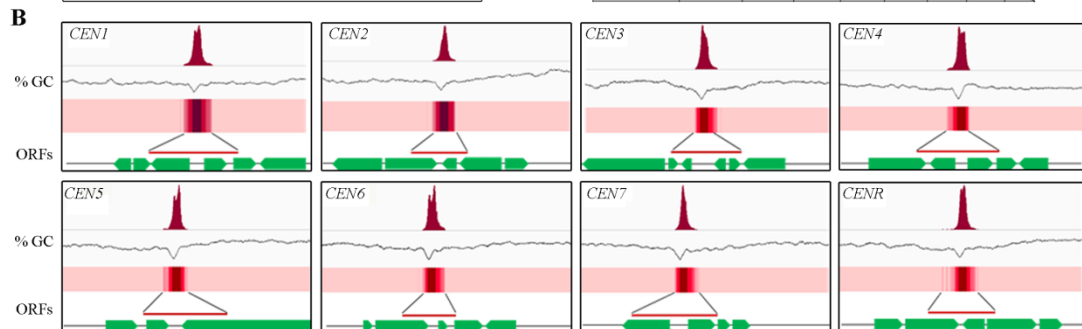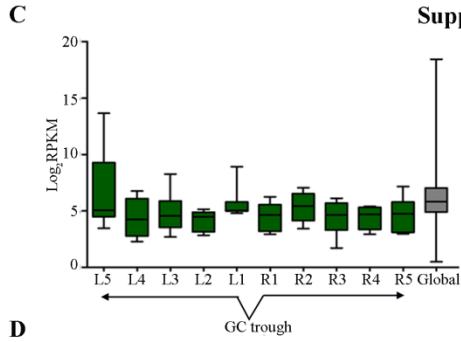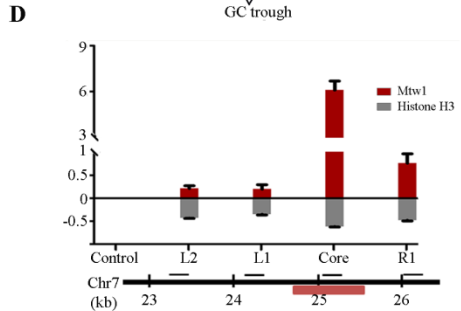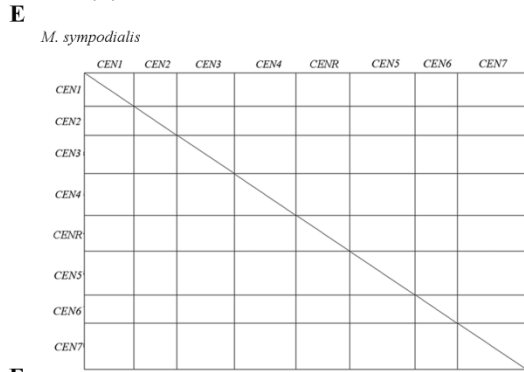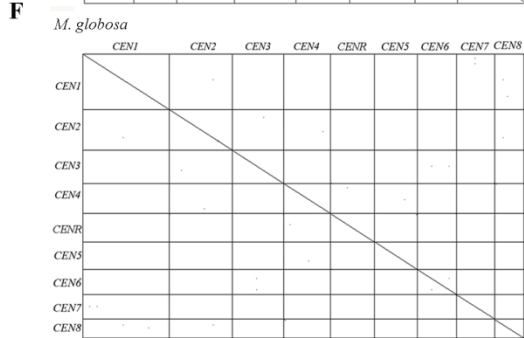

**A**

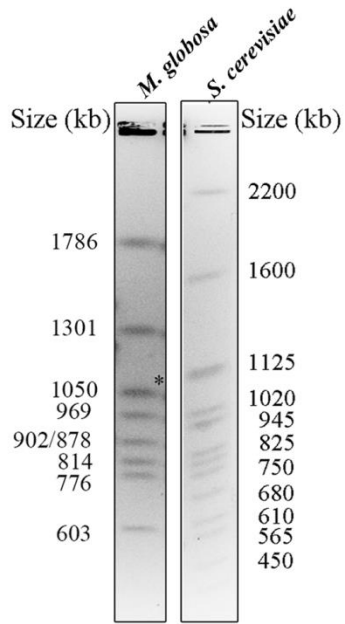

**B**

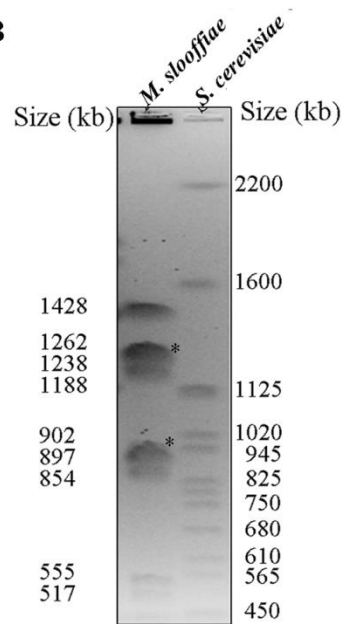

**C**

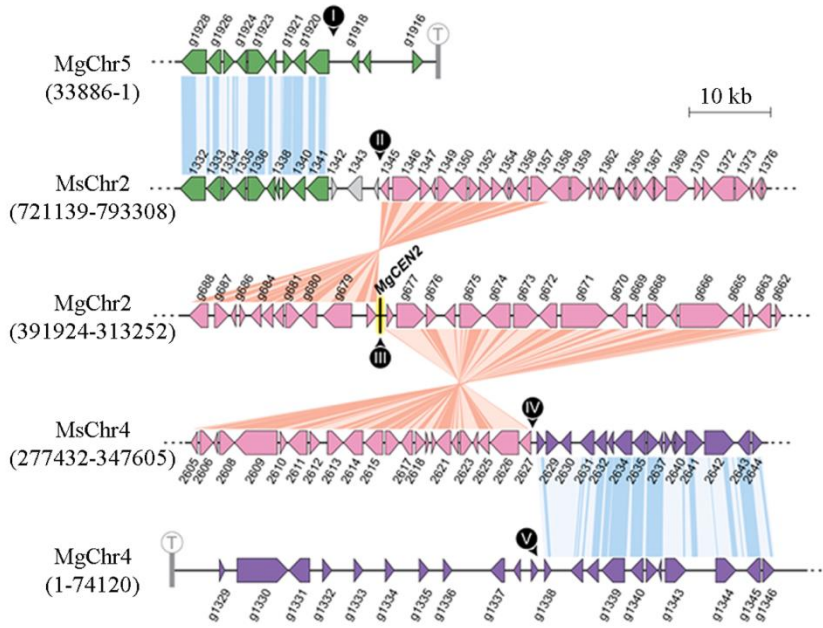



A

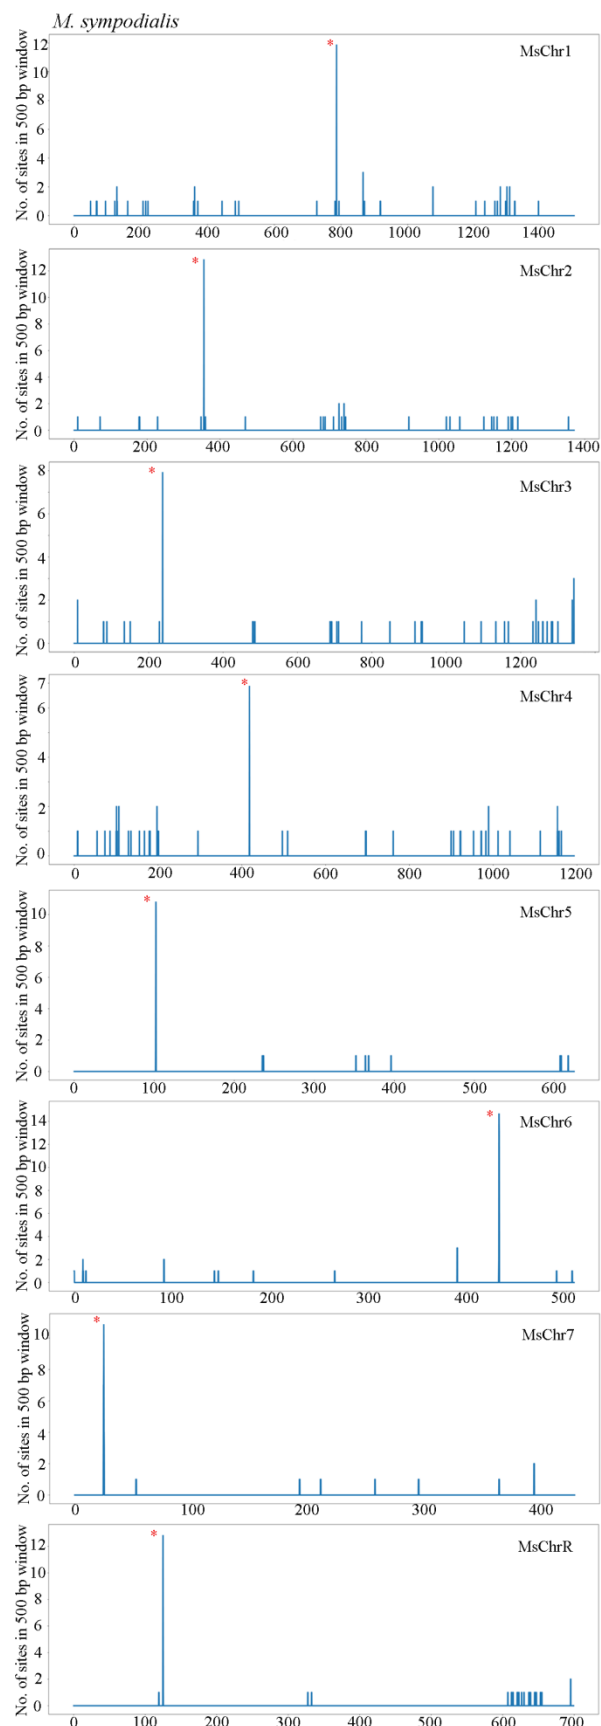

Figure S3

B

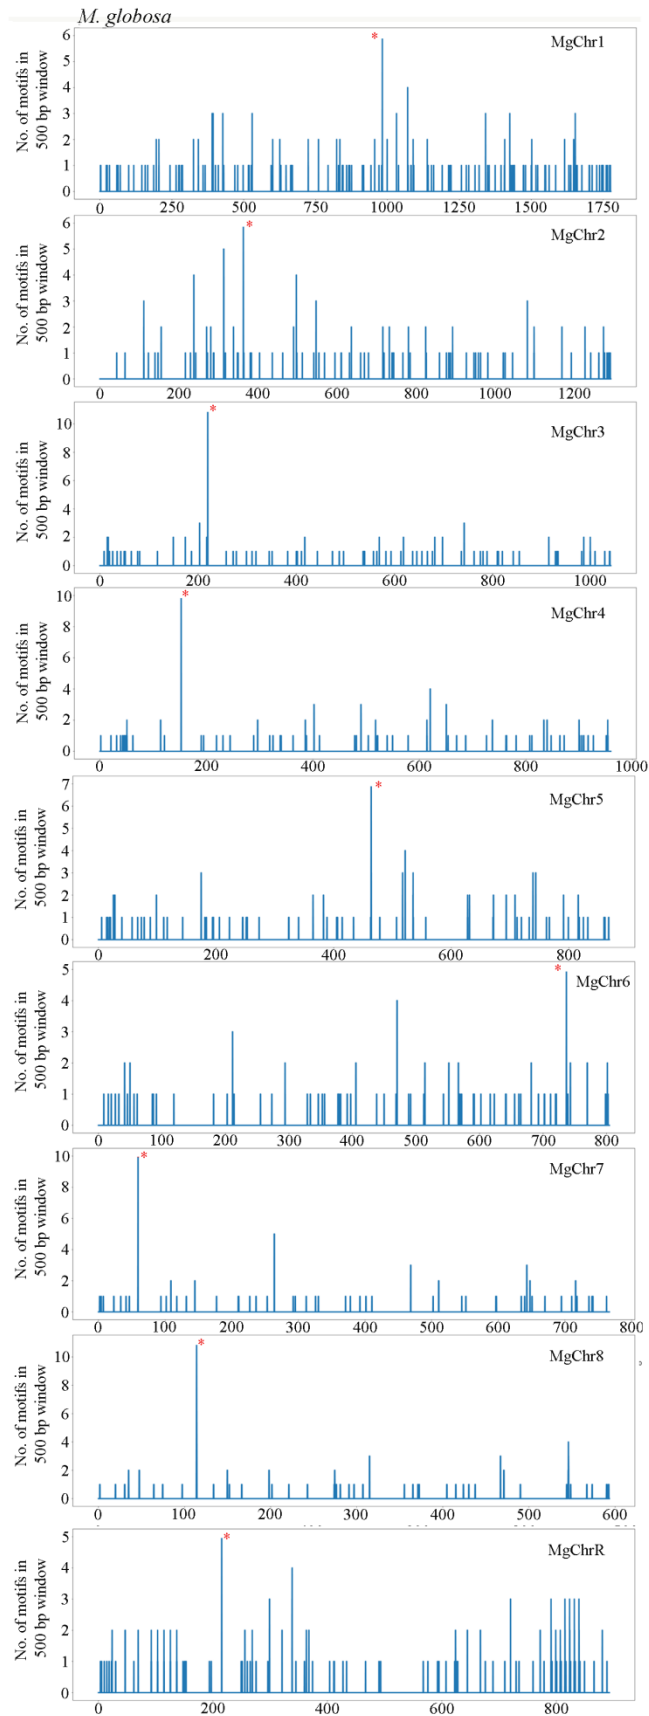

Figure S3

C

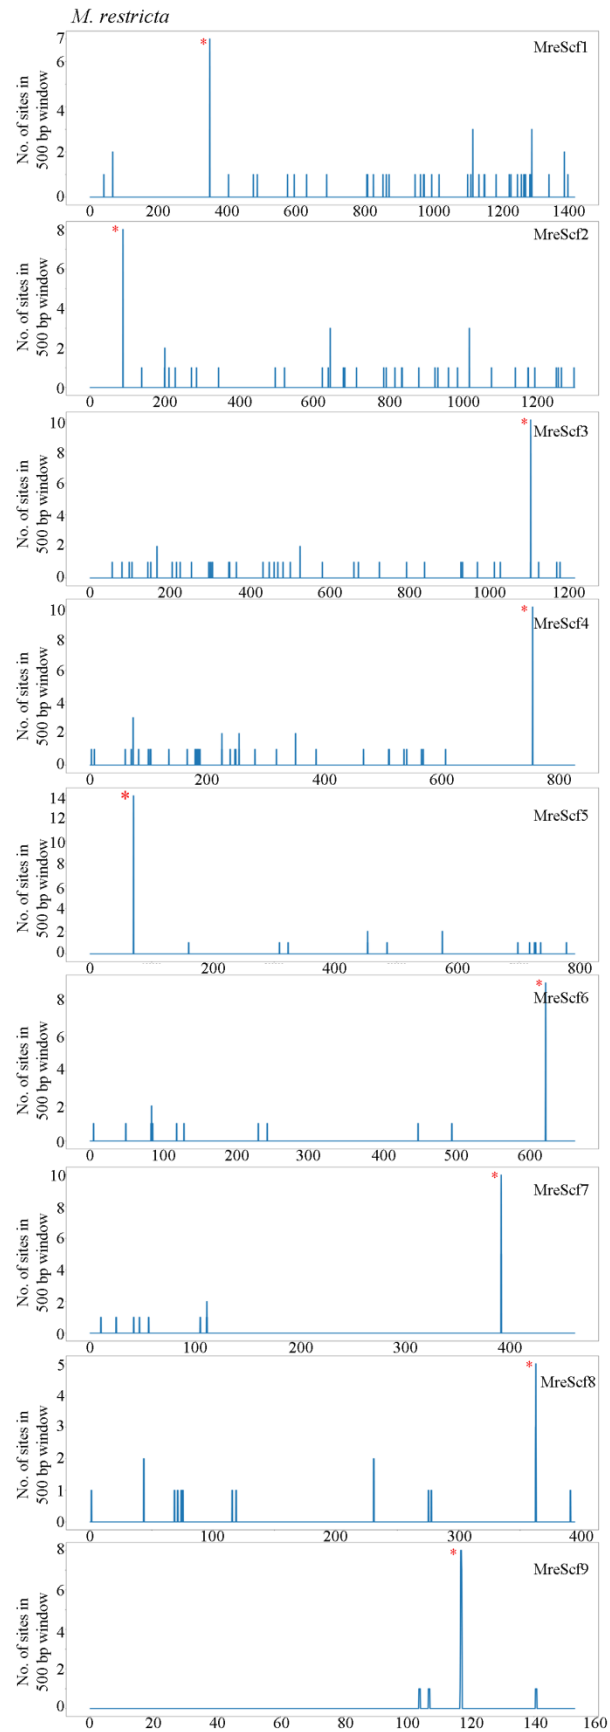

Figure S3

D

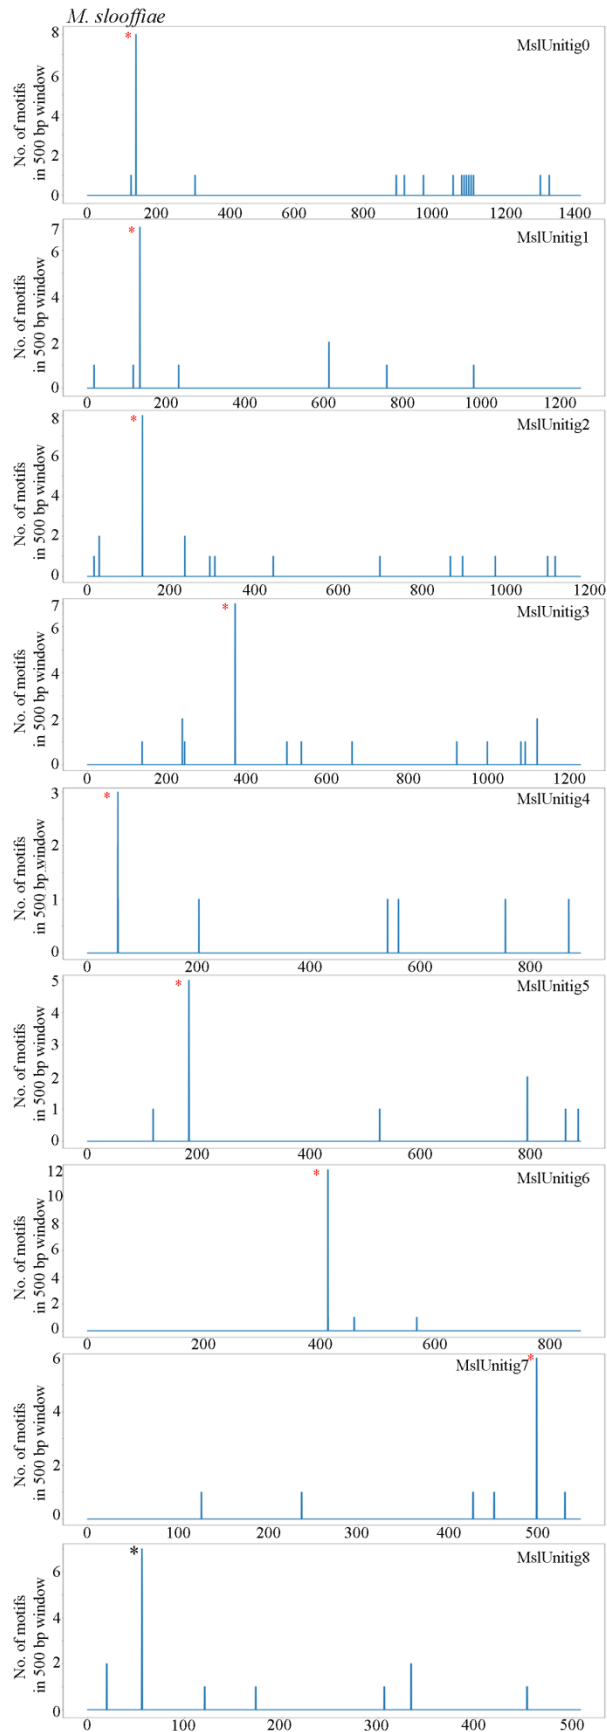

Figure S3

E

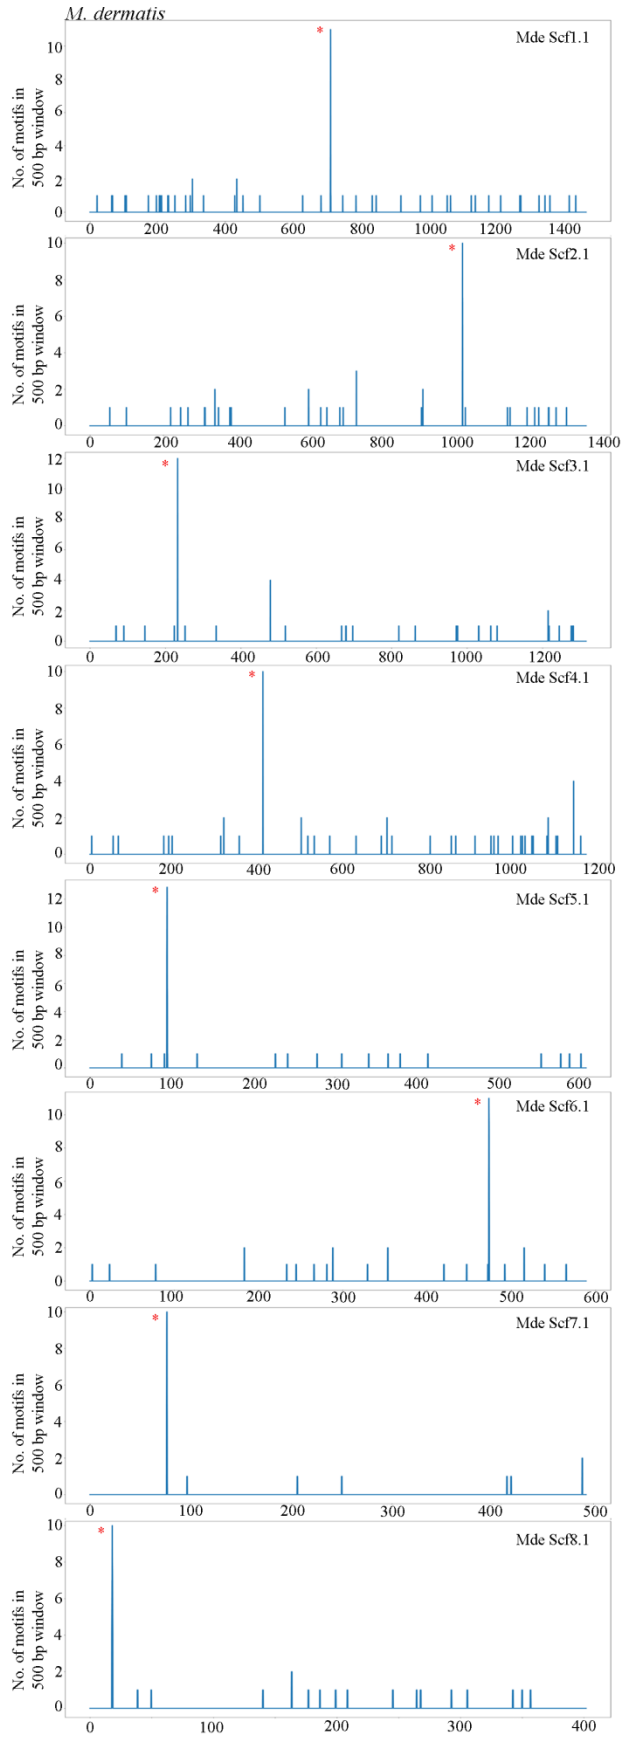

Figure S3

F

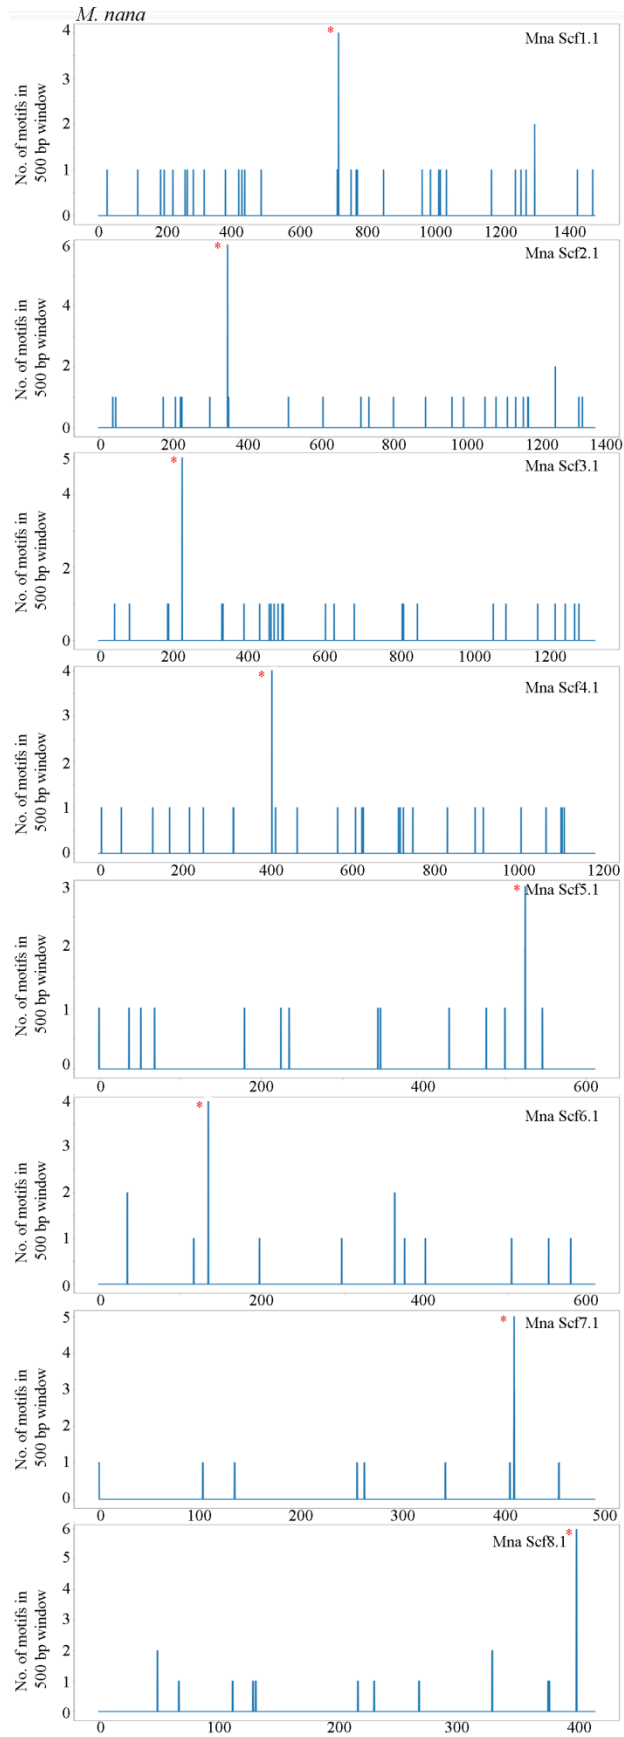

Figure S3

Supplementary figure S4

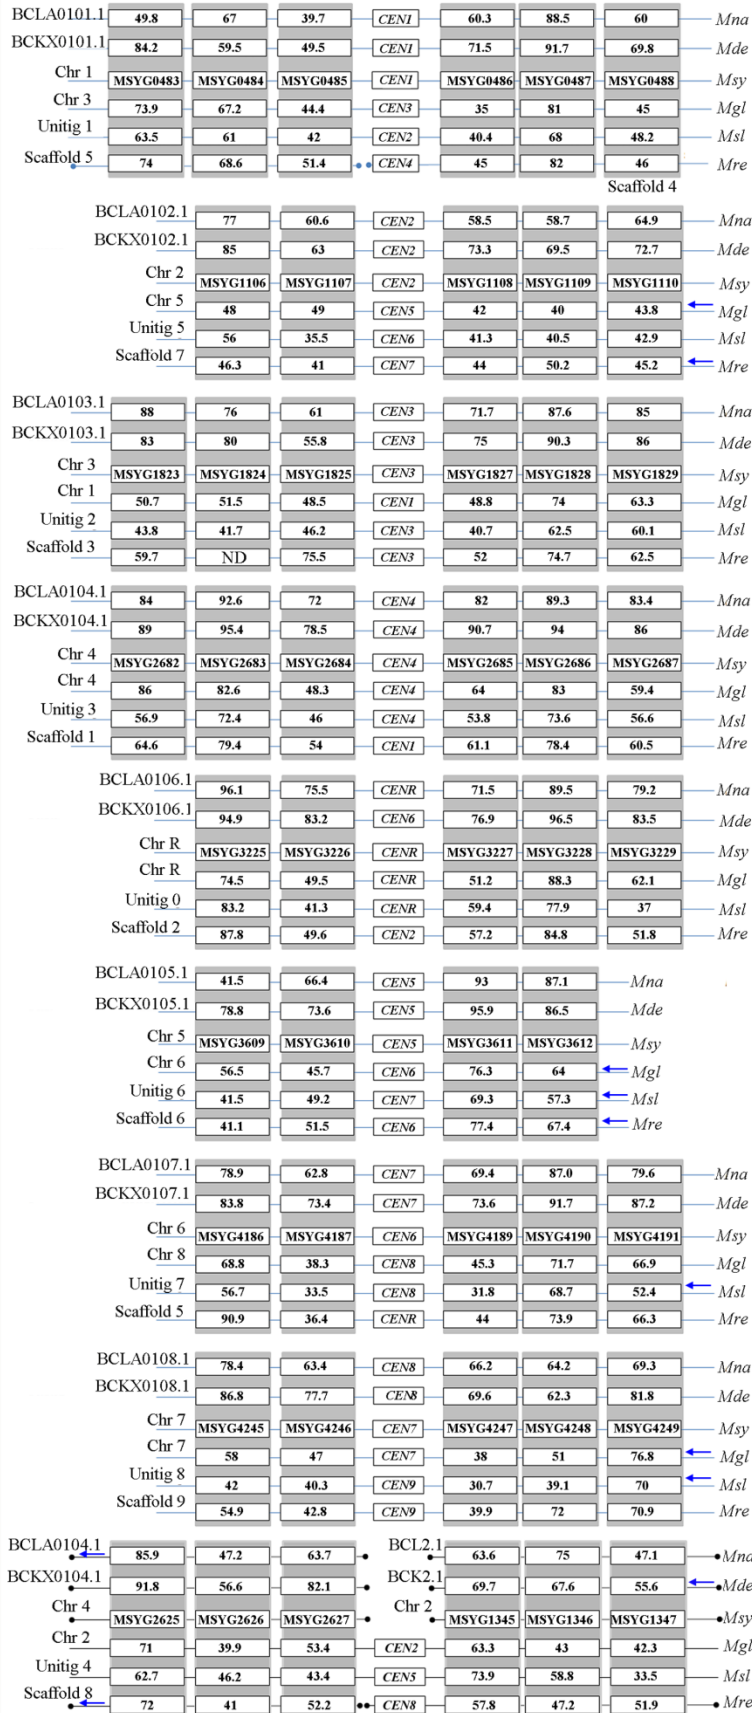

## Supplementary references

1. Eckert-Boulet N, Pedersen ML, Krogh BO, & Lisby M (2012) Optimization of ordered plasmid assembly by gap repair in *Saccharomyces cerevisiae*. *Yeast* 29(8):323-334.
2. Ianiri G, Averette AF, Kingsbury JM, Heitman J, & Idnurm A (2016) Gene function analysis in the ubiquitous human commensal and pathogen *Malassezia* Genus. *mBio* 7(6).
3. Kozubowski L, *et al.* (2013) Ordered kinetochore assembly in the human-pathogenic basidiomycetous yeast *Cryptococcus neoformans*. *mBio* 4(5):e00614-00613.
4. Ianiri G, Applen Clancey S, Lee SC, & Heitman J (2017) FKBP12-dependent inhibition of calcineurin mediates immunosuppressive antifungal drug action in *Malassezia*. *mBio* 8(5).
5. Boekhout TaN, E.S., (2003) *Pulsed Field Gel Electrophoresis (PFGE) of Yeasts* pp pp. 93–103.
6. Yadav V, *et al.* (2018) RNAi is a critical determinant of centromere evolution in closely related fungi. *Proc Natl Acad Sci U S A* 115(12):3108-3113.
7. Sun S, Billmyre RB, Mieczkowski PA, & Heitman J (2014) Unisexual reproduction drives meiotic recombination and phenotypic and karyotypic plasticity in *Cryptococcus neoformans*. *PLoS Genet* 10(12):e1004849.
8. Sun S, *et al.* (2017) Fungal genome and mating system transitions facilitated by chromosomal translocations involving intercentromeric recombination. *PLoS Biol* 15(8):e2002527.
9. Findley K, *et al.* (2012) Discovery of a modified tetrapolar sexual cycle in *Cryptococcus amyloletus* and the evolution of MAT in the *Cryptococcus* species complex. *PLoS Genet* 8(2):e1002528.
10. Krzywinski M, *et al.* (2009) Circos: an information aesthetic for comparative genomics. *Genome Res* 19(9):1639-1645.
11. Grabherr MG, *et al.* (2010) Genome-wide synteny through highly sensitive sequence alignment: Satsuma. *Bioinformatics* 26(9):1145-1151.
12. Sullivan MJ, Petty NK, & Beatson SA (2011) Easyfig: a genome comparison visualizer. *Bioinformatics* 27(7):1009-1010.
13. Ianiri G, Boyce KJ, & Idnurm A (2017) Isolation of conditional mutations in genes essential for viability of *Cryptococcus neoformans*. *Curr Genet* 63(3):519-530.
14. Soderlund C, Bomhoff M, & Nelson WM (2011) SyMAP v3.4: a turnkey synteny system with application to plant genomes. *Nucleic Acids Res* 39(10):e68.
15. Siddharthan R (2008) PhyloGibbs-MP: module prediction and discriminative motif-finding by Gibbs sampling. *PLoS Comput Biol* 4(8):e1000156.
16. Bradley RK, *et al.* (2009) Fast statistical alignment. *PLoS Comput Biol* 5(5):e1000392.
